# Supplementary material for: A hypothalamic circuit mechanism underlying the impact of stress on memory and sleep
Source: PubMed Central journal article supplement — bioRxiv. 2024 Oct 18:2024.10.17.618467. Preprint. [Version 1] doi: 10.1101/2024.10.17.618467 (PMC11507874; doi:10.1101/2024.10.17.618467), 2024-10-18
Supplement: media-1.pdf [file media-1.pdf]

Figure S1

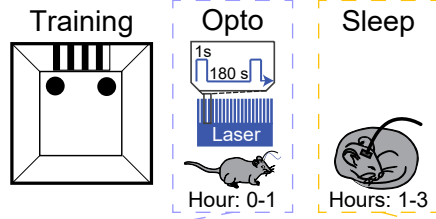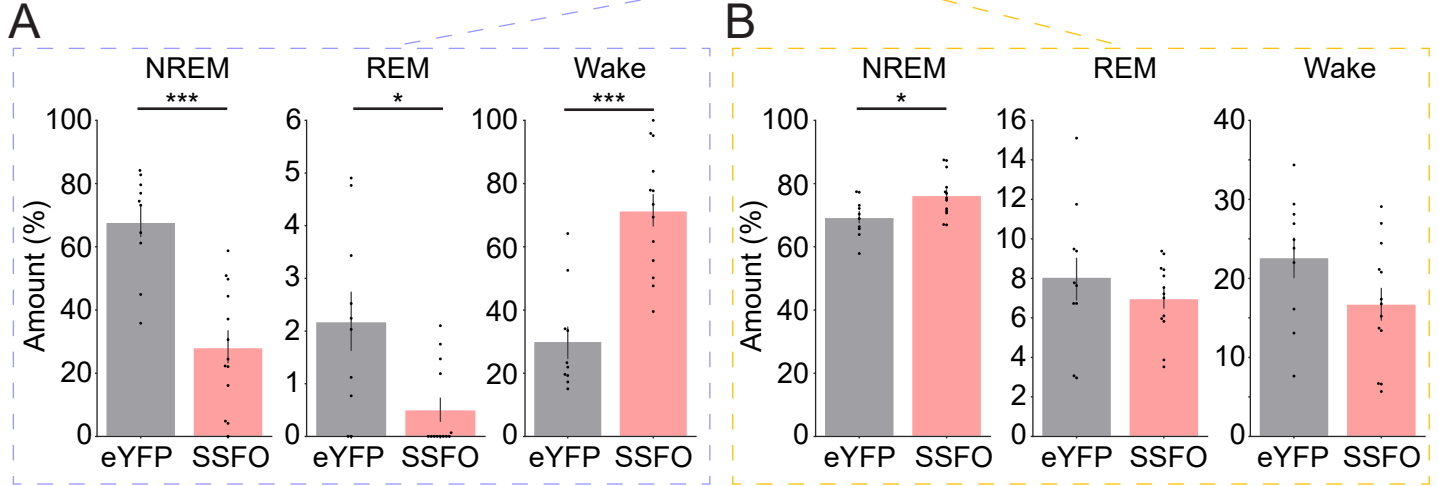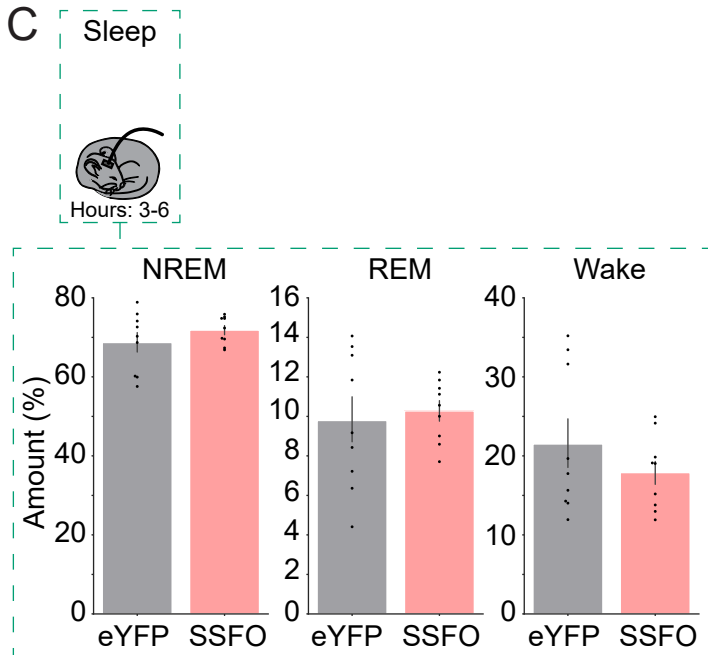

Figure S2

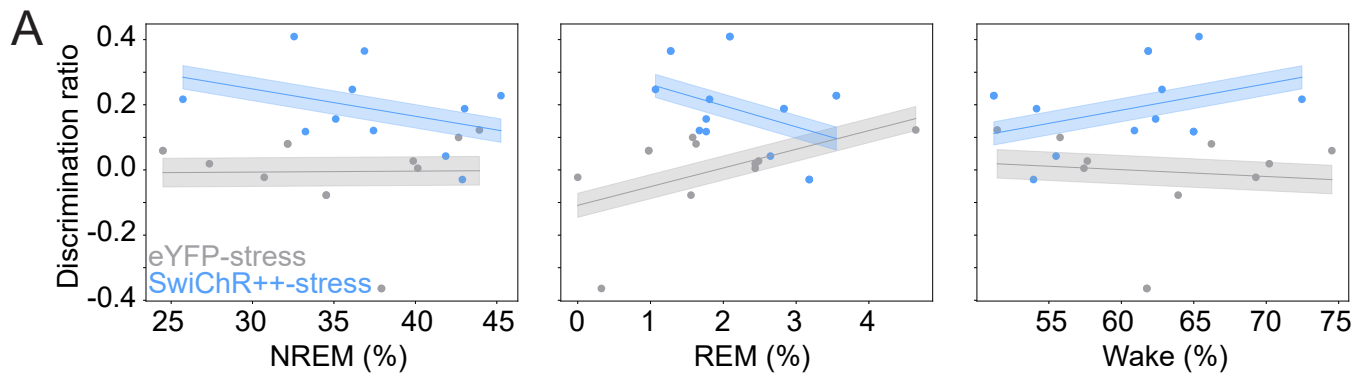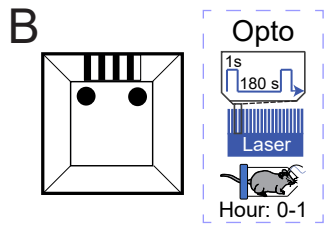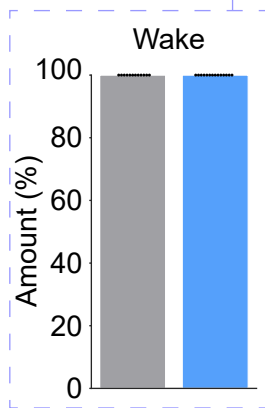

Figure S3

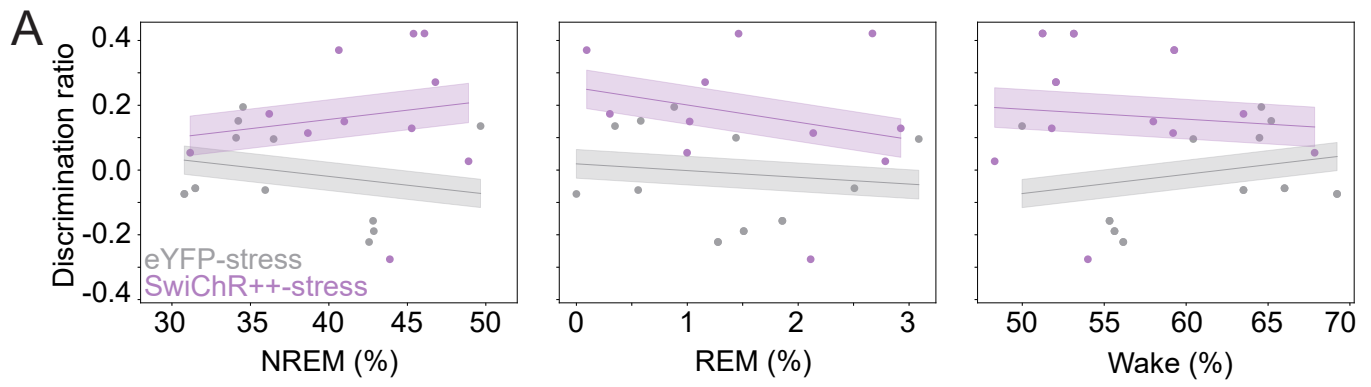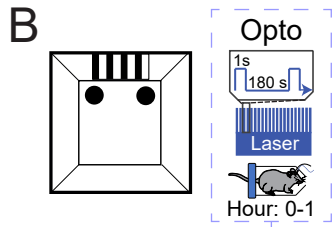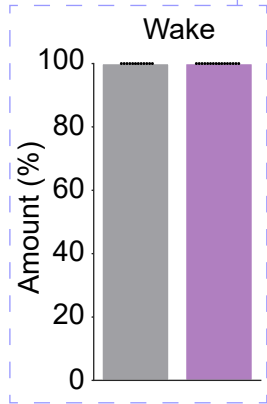

| Figure | Statistical test   | Values                                                                                                                                                                                                                                                                                                                                                                                           | Sample size                                                               |
|--------|--------------------|--------------------------------------------------------------------------------------------------------------------------------------------------------------------------------------------------------------------------------------------------------------------------------------------------------------------------------------------------------------------------------------------------|---------------------------------------------------------------------------|
| 1D     | Paired t-test      | Test vs. Training<br>eYFP: T(8) = 3.032, P = 0.0163<br>SSFO: T(9) = 0.1356, P = 0.8951                                                                                                                                                                                                                                                                                                           | 9 eYFP mice<br>10 SSFO mice                                               |
| 1E     | T-test             | SSFO vs. eYFP<br>T(17) = 3.087, P = 0.0067                                                                                                                                                                                                                                                                                                                                                       | 9 eYFP mice<br>10 SSFO mice                                               |
| 1G     | T-test             | eYFP vs. SSFO<br>NREM: T(14.594) = 2.894, P = 0.011<br>REM: T(13.012) = 1.445, P = 0.172<br>Wake: T(15.109) = -2.900, P = 0.011                                                                                                                                                                                                                                                                  | 10 eYFP mice<br>13 SSFO mice                                              |
| 1H     | Linear Mixed Model | NREM: Coef = 0.009, Std.Err = 0.006, z = 1.572, P = 0.116<br>Group: Coef = -0.152, Std. Err = 0.253, z = -0.603, P = 0.547<br><br>REM: Coef = 0.024, Std. Err = 0.020, z = 1.202, P = 0.230<br>Group: Coef = -0.203, Std. Err = 0.255, z = -0.794, P = 0.427<br><br>Wake: Coef = -0.009, Std.Err = 0.005, z = -1.716, P = 0.086<br>Group: Coef = -0.143, Std. Err = 0.250, z = -0.572, P = 0.567 | 9 eYFP mice<br>10 SSFO mice                                               |
| 2C     | Paired t-test      | Test vs. Training<br>Control: T(11) = 2.493, P = 0.0299<br>Stress: T(8) = 0.5953, P = 0.5681                                                                                                                                                                                                                                                                                                     | 12 control mice<br>9 stress mice                                          |
| 2D     | T-test             | Stress vs. Control<br>T(19) = 2.133, P = 0.0462                                                                                                                                                                                                                                                                                                                                                  | 12 control mice<br>9 stress mice                                          |
| 2H     | Paired t-test      | Test vs. Training<br>eYFP-stress: T(10) = 0.2191, P = 0.8309<br>SwiChr+-stress: T(10) = 5.342, P = 0.0003                                                                                                                                                                                                                                                                                        | 11 eYFP-stress mice<br>11 SwiChr+-stress mice                             |
| 2I     | T-test             | SwiChr+-stress vs. eYFP-stress<br>T(20) = 3.352, P = 0.0032                                                                                                                                                                                                                                                                                                                                      | 11 eYFP-stress mice<br>11 SwiChr+-stress mice                             |
| 2K     | T-test             | eYFP-stress vs. SwiChr+-stress<br>NREM: T(23.311) = -1.775, P = 0.089<br>REM: T(18.324) = -1.263, P = 0.222<br>Wake: T(23.108) = 1.829, P = 0.080                                                                                                                                                                                                                                                | 12 eYFP-stress mice<br>14 SwiChr+-stress mice                             |
| 3D     | Paired t-test      | Test vs. Training<br>eYFP: T(9) = 3.213, P = 0.0106<br>SwiChr+-: T(9) = 2.291, P = 0.0477                                                                                                                                                                                                                                                                                                        | 10 eYFP mice<br>10 SwiChr+ mice                                           |
| 3E     | T-test             | SwiChr+ vs. eYFP<br>T(18) = 0.9133, P = 0.3731                                                                                                                                                                                                                                                                                                                                                   | 10 eYFP mice<br>10 SwiChr+ mice                                           |
| 3G     | T-test             | eYFP vs. SwiChr+<br>NREM: T(24.868) = 0.628, P = 0.536<br>REM: T(18.307) = 0.565, P = 0.579<br>Wake: T(24.130) = -0.702, P = 0.490                                                                                                                                                                                                                                                               | 13 eYFP mice<br>15 SwiChr+ mice                                           |
| 4C     | T-test             | Stress vs. Control<br>T(4) = 9.725, P = 0.0006                                                                                                                                                                                                                                                                                                                                                   | 3 control mice<br>3 stress mice<br>(averaged 3 sections/mouse, bilateral) |
| 4F     | T-test             | SSFO vs. eYFP<br>T(7) = 2.762, P = 0.0280                                                                                                                                                                                                                                                                                                                                                        | 4 eYFP mice<br>5 SSFO mice<br>(averaged 2 sections/mouse, unilateral)     |
| 4J     | Paired t-test      | Test vs. Training<br>eYFP-stress: T(10) = 0.2768, P = 0.7876<br>SwiChr+-stress: T(10) = 2.974, P = 0.0139                                                                                                                                                                                                                                                                                        | 11 eYFP-stress mice<br>11 SwiChr+-stress mice                             |
| 4K     | T-test             | SwiChr+-stress vs. eYFP-stress<br>T(20) = 2.320, P = 0.0310                                                                                                                                                                                                                                                                                                                                      | 11 eYFP-stress mice<br>11 SwiChr+-stress mice                             |
| 4M     | T-test             | eYFP-stress vs. SwiChr+-stress<br>NREM: T(20.024) = -2.381, P = 0.027<br>REM: T(24.157) = -0.664, P = 0.513<br>Wake: T(21.458) = 2.405, P = 0.025                                                                                                                                                                                                                                                | 12 eYFP-stress mice<br>16 SwiChr+-stress mice                             |
| S1A    | T-test             | eYFP vs. SSFO<br>NREM: T(20.737) = 5.354, P = 0.000027<br>REM: T(11.830) = 2.766, P = 0.017<br>Wake: T(20.798) = -5.499, P = 0.000019                                                                                                                                                                                                                                                            | 10 eYFP mice<br>13 SSFO mice                                              |
| S1B    | T-test             | eYFP vs. SSFO<br>NREM: T(20.591) = -2.546, P = 0.019<br>REM: T(12.551) = 0.851, P = 0.411<br>Wake: T(18.834) = 1.761, P = 0.094                                                                                                                                                                                                                                                                  | 10 eYFP mice<br>13 SSFO mice                                              |
| S1C    | T-test             | eYFP vs. SSFO<br>NREM: T(16) = -1.109, P = 0.284<br>REM: T(16) = -0.381, P = 0.708<br>Wake: T(16) = 1.046, P = 0.311                                                                                                                                                                                                                                                                             | 9 eYFP mice<br>9 SSFO mice                                                |
| S2A    | Linear Mixed Model | NREM: Coef = -0.004, Std.Err = 0.005, z = -0.724, P = 0.469<br>Group: Coef = 0.200, Std. Err = 0.201, z = 0.994, P = 0.320<br><br>REM: Coef = 0.022, Std. Err = 0.029, z = 0.765, P = 0.444<br>Group: Coef = 0.185, Std. Err = 0.200, z = 0.923, P = 0.356<br><br>Wake: Coef = 0.002, Std. Err = 0.005, z = 0.538, P = 0.591<br>Group: Coef = 0.198, Std. Err = 0.202, z = 0.981, P = 0.326      | 10 eYFP-stress mice<br>11 SwiChr+-stress mice                             |
| S2B    | T-test             | Wake: All mice recorded had 100% wake; variance = 0, preventing standard t-test calculation.                                                                                                                                                                                                                                                                                                     | 12 eYFP-stress mice<br>14 SwiChr+-stress mice                             |
| S3A    | Linear Mixed Model | NREM: Coef = -0.000, Std.Err = 0.007, z = -0.065, P = 0.948<br>Group: Coef = 0.178, Std. Err = 0.272, z = 0.656, P = 0.512<br><br>REM: Coef = -0.038, Std. Err = 0.041, z = -0.909, P = 0.363<br>Group: Coef = 0.189, Std. Err = 0.265, z = 0.713, P = 0.476<br><br>Wake: Coef = 0.001, Std. Err = 0.007, z = 0.207, P = 0.836<br>Group: Coef = 0.183, Std. Err = 0.135, z = 1.355, P = 0.175    | 11 eYFP-stress mice<br>11 SwiChr+-stress mice                             |
| S3B    | T-test             | Wake: All mice recorded had 100% wake; variance = 0, preventing standard t-test calculation.                                                                                                                                                                                                                                                                                                     | 12 eYFP-stress mice<br>16 SwiChr+-stress mice                             |

Table S1
